# Supplementary material for: The Domestication Syndrome in Phoenix dactylifera Seeds: Toward the Identification of Wild Date Palm Populations
Source: PubMed Central journal article supplement (PMC4807022; doi:10.1371/journal.pone.0152394), 2016-03-24
Supplement: pone.0152394.s003.pdf [file pone.0152394.s003.pdf]

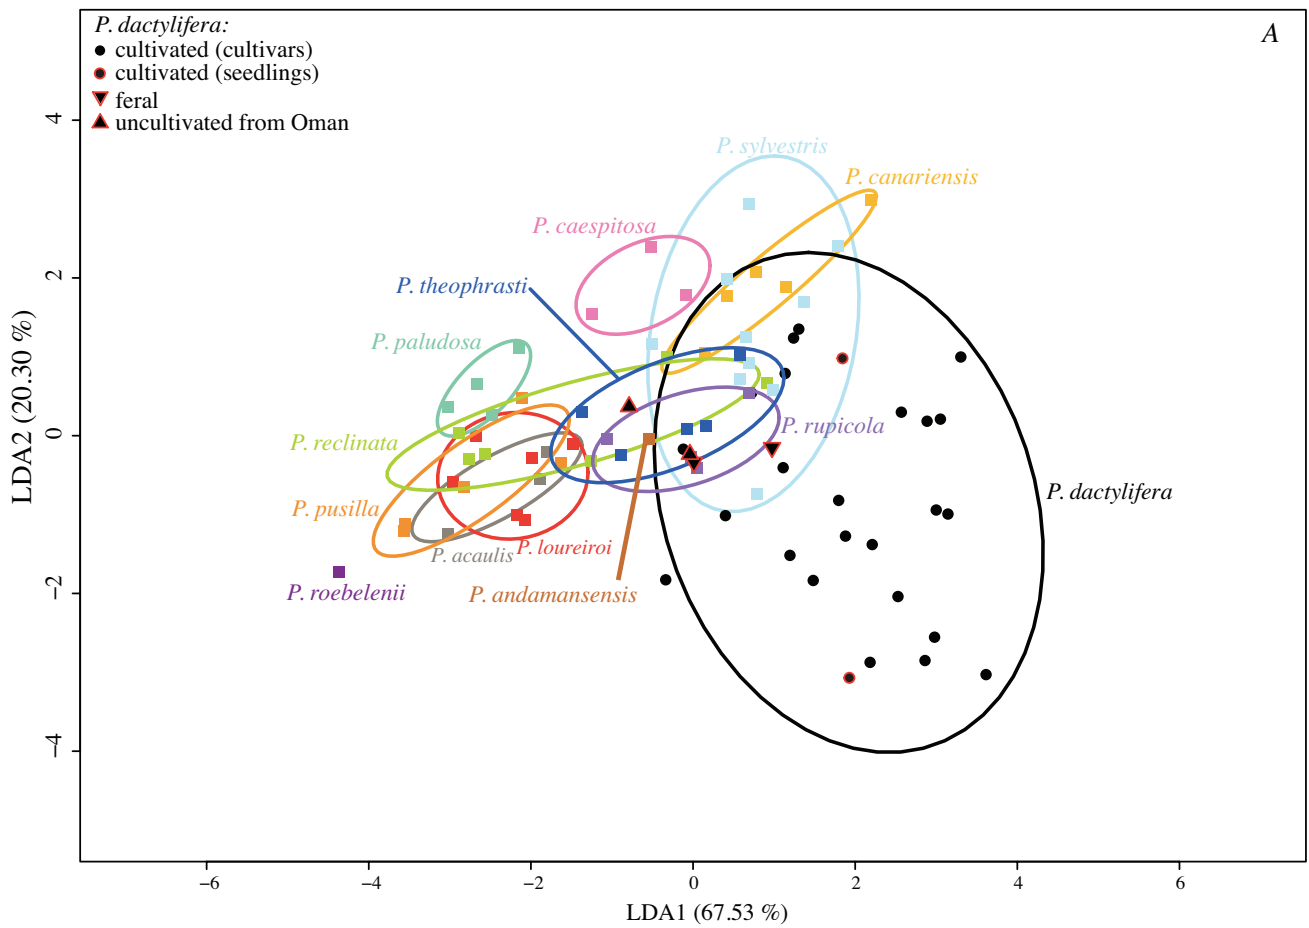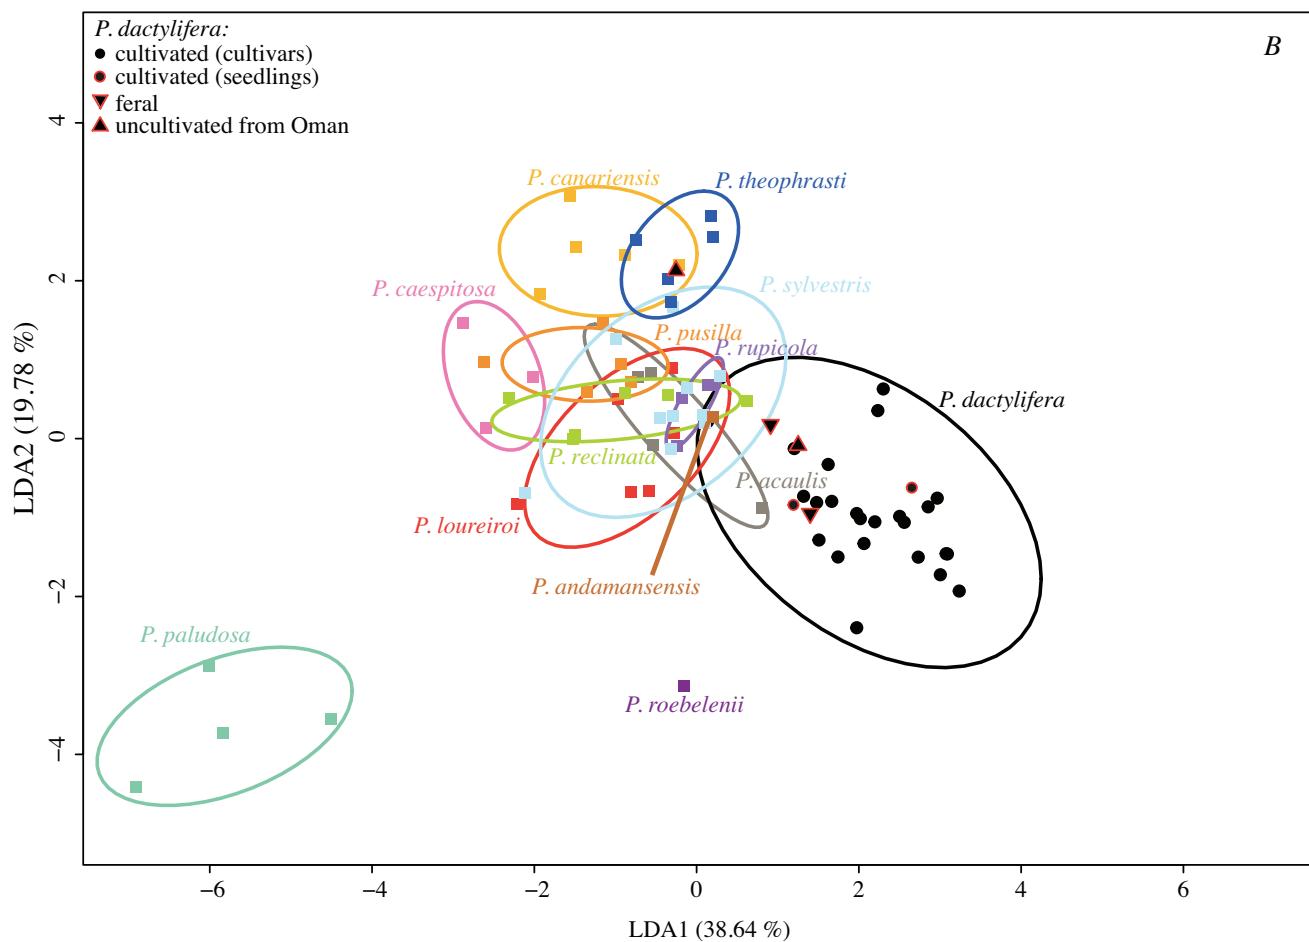

**S1 Figure. Linear Discriminant Analysis of seed measurements aiming at differentiating *Phoenix* species.** (A) four seed size parameters and (B) seed shape (normalized elliptic Fourier coefficients).
