# Supplementary material for: The Domestication Syndrome in Phoenix dactylifera Seeds: Toward the Identification of Wild Date Palm Populations
Source: PubMed Central journal article supplement (PMC4807022; doi:10.1371/journal.pone.0152394), 2016-03-24
Supplement: pone.0152394.s004.pdf [file pone.0152394.s004.pdf]

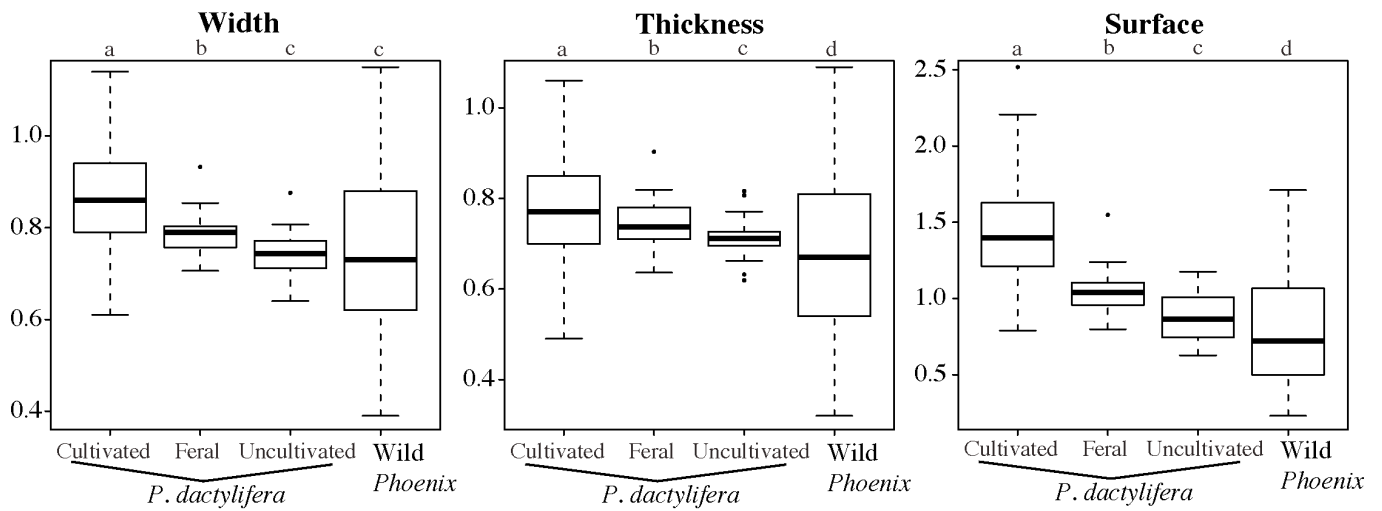

**S2 Figure. Comparison of seed width, thickness and surface between date palms from cultivated, feral and uncultivated populations of unknown status with wild *Phoenix* (mm).** The group derived from Tukey's test is displayed on top of each group's boxplot.
